# Supplementary material for: Multifractal Characteristics of Uranium Grade Distribution and Spatial Regularities in a Sandstone Type Uranium Deposit in Xinjiang, China
Source: Preprints.org preprint supplement (doi:10.20944/preprints202309.1230.v1), 2023-09-19
Supplement: Supplementary file 1 [file supplementary]

：scale exponent of the mass moment(*q*-order)

：scale exponent

：fractal dimension corresponding to the scaling exponent

*Dq* ：Renyi dimension

*D0*： the fractal dimension

*D1*： the information dimension
